# Supplementary material for: A new insight of a pH-dependent fluorescence switching mechanism and the novel radical scavenging ability of nitrogen-doped citric acid-based carbon dots
Source: Royal Society of Chemistry journal article supplement (doi:10.1039/d6ra00349d), 2026-04-10
Supplement: d6ra00349d1.pdf [file d6ra00349d1.pdf]

## A new insight of pH-dependent fluorescence switching mechanism and a novel radical scavenging ability of nitrogen-doped citric acid-based carbon dots

Bao Bui-Thi,<sup>a</sup> Mai Anh Ngo,<sup>a</sup> Dao Dang Thi Bich,<sup>a</sup> Van-Thao Ta,<sup>b</sup> Hoa Tran-Khanh,<sup>c</sup> Thi Bich Viet Nguyen,<sup>a</sup> Nga Tran-The<sup>a</sup> and Ngan Nguyen-Bich<sup>\*a</sup>

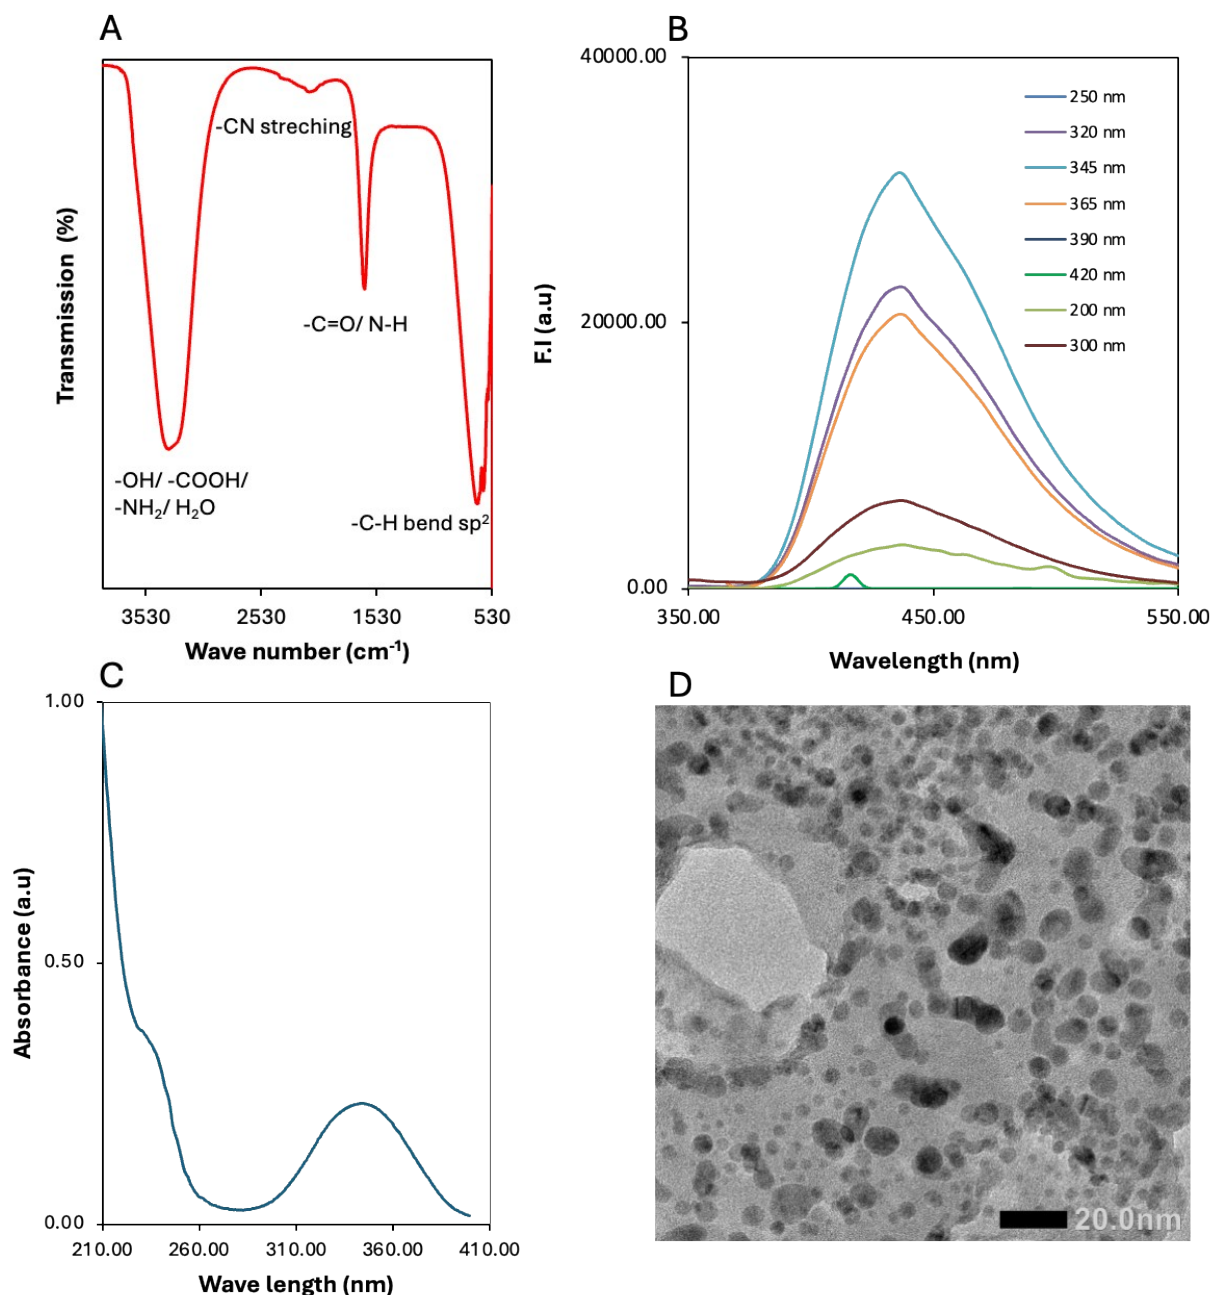

Figure S 1

The N-CADots FT-IR spectrum (A), emission independent excitation spectra (B), absorbance spectrum (C), TEM image (D)

|                              |                  | Before dialysis                |                                             |                                                  |                                                  | After dialysis                      |                                                  |                                                  | p (pK <sub>a</sub> )<br>before<br>and<br>after<br>dialysis | pK <sub>a</sub><br>average | pK <sub>a</sub><br>RSD |
|------------------------------|------------------|--------------------------------|---------------------------------------------|--------------------------------------------------|--------------------------------------------------|-------------------------------------|--------------------------------------------------|--------------------------------------------------|------------------------------------------------------------|----------------------------|------------------------|
|                              |                  | CA<br>or<br>NH <sub>4</sub> Cl | CA-<br>NH <sub>4</sub> Cl<br>- pH<br>nature | CA-<br>NH <sub>4</sub> Cl<br>Adjusted<br>pH acid | CA-<br>NH <sub>4</sub> Cl<br>Adjusted<br>pH base | CA-<br>NH <sub>4</sub> Cl<br>nature | CA-<br>NH <sub>4</sub> Cl<br>Adjusted<br>pH acid | CA-<br>NH <sub>4</sub> Cl<br>Adjusted<br>pH base |                                                            |                            |                        |
| CA                           | pK <sub>a1</sub> | 3.25                           | 3.24                                        | 3.58                                             | 3.79                                             | 3.78                                | 3.41                                             | 3.68                                             | 0.55                                                       | 3.54                       | 0.20                   |
|                              |                  | 3.32                           | 3.38                                        | 3.68                                             | 3.82                                             | 3.64                                | 3.53                                             | 3.42                                             |                                                            |                            |                        |
|                              | pK <sub>a2</sub> | 4.84                           | 5.04                                        | 5.10                                             | 5.12                                             | 5.06                                | 5.10                                             | 5.19                                             | 0.43                                                       | 5.00                       | 0.12                   |
|                              |                  | 4.94                           | 4.78                                        | 4.92                                             | 5.06                                             | 4.94                                | 5.05                                             | 4.84                                             |                                                            |                            |                        |
|                              | pK <sub>a3</sub> | 6.37                           | 6.65                                        | 6.68                                             | 6.63                                             | 6.60                                | 6.47                                             | 6.57                                             | 0.33                                                       | 6.52                       | 0.10                   |
|                              |                  | 6.60                           | 6.50                                        | 6.45                                             | 6.55                                             | 6.40                                | 6.57                                             | 6.37                                             |                                                            |                            |                        |
| C (mM)                       | 5.1              | 4.9                            | 4.8                                         | 5.0                                              | 3.2                                              | 2.8                                 | 2.9                                              |                                                  |                                                            |                            |                        |
|                              | 4.9              | 5.0                            | 4.9                                         | 4.9                                              | 3.0                                              | 2.9                                 | 3.1                                              |                                                  |                                                            |                            |                        |
| NH <sub>4</sub> <sup>+</sup> | pK <sub>a</sub>  | 9.34                           | 9.35                                        | 9.33                                             | 9.30                                             | 9.42                                | 9.38                                             | 9.27                                             | 0.48                                                       | 9.33                       | 0.05                   |
|                              |                  | 9.37                           | 9.38                                        | 9.27                                             | 9.28                                             | 9.30                                | 9.39                                             | 9.31                                             |                                                            |                            |                        |
|                              | C (nM)           | 51.0                           | 50.0                                        | 50.0                                             | 52.1                                             | 9.6                                 | 11.4                                             | 10.0                                             |                                                            |                            |                        |
|                              |                  | 51.4                           | 51.2                                        | 51.0                                             | 51.2                                             | 10.4                                | 11.6                                             | 9.4                                              |                                                            |                            |                        |

Table S 1 The apparent pK<sub>a</sub> of purified citrate acid (CA) and ammonium solutions

|                                                                                    | pK <sub>a1</sub> | pK <sub>a2</sub> | pK <sub>a3</sub> | pK <sub>a4</sub> | pK <sub>a5</sub> | pK <sub>a6</sub> | pK <sub>a7</sub> | pK <sub>a8</sub> | pK <sub>a9</sub> |
|------------------------------------------------------------------------------------|------------------|------------------|------------------|------------------|------------------|------------------|------------------|------------------|------------------|
|                                                                                    | 2.35             | 3.14             | 4.66             | 5.22             | 5.81             | 6.10             | 7.10             | 9.33             | 9.65             |
|                                                                                    | 2.02             | 3.75             | 4.46             | 5.11             | 5.57             | 6.39             | 7.21             | 9.33             | 9.80             |
|                                                                                    | 2.35             | 3.13             | 4.76             | 4.98             | 5.87             | 6.25             | 6.77             | 9.33             | 9.50             |
|                                                                                    |                  |                  | 4.52             |                  |                  | 6.47             | 7.02             | 9.38             | 9.78             |
|                                                                                    |                  |                  | 4.37             |                  |                  | 6.58             | 7.11             |                  | 9.67             |
|                                                                                    |                  |                  | 4.17             |                  |                  | 6.42             |                  |                  | 9.70             |
|                                                                                    |                  |                  | 4.24             |                  |                  |                  |                  |                  |                  |
|                                                                                    |                  |                  | 4.10             |                  |                  |                  |                  |                  |                  |
| Apparent pK <sub>a</sub>                                                           | 2.24±0.19        | 3.34 ± 0.36      | 4.41 ± 0.22      | 5.10 ± 0.12      | 5.75 ± 0.16      | 6.37 ± 0.17      | 7.04 ± 0.19      | 9.34 ± 0.03      | 9.69 ± 0.12      |
| t-test<br>between pK <sub>a<sub>i</sub></sub><br>and pK <sub>a<sub>i+1</sub></sub> | 0.017            | 0.022            | 0.000            | 0.006            | 0.004            | 0.000            | 0.000            | 0.000            |                  |

Table S 2 The apparent pK<sub>a</sub> of N-CAdots synthesis system after dialysis

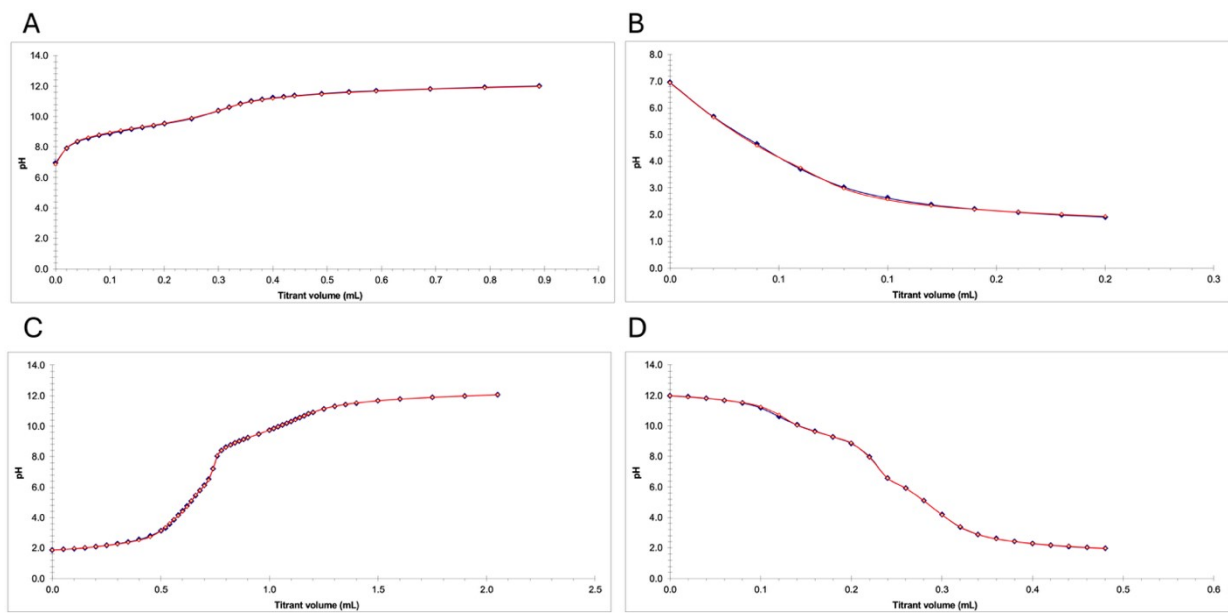

Figure S 2 The potentiometric titration curves and fitting curves using Curtipot software. The nature N-CADot dialysis solution titrated with KOH (A) and HCl (B). Adjusted N-CADot dialysis solution titrated with KOH (C) and HCl (D)

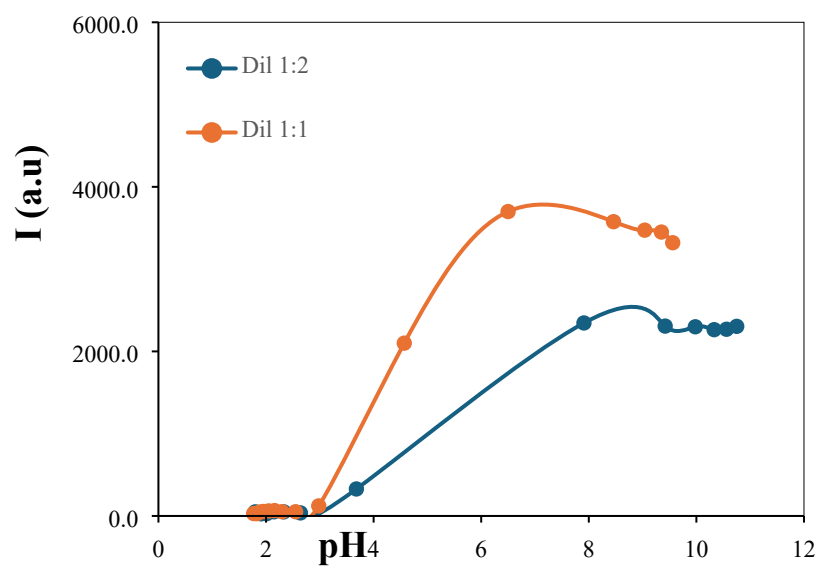

Figure S 3 Fluorescence titration curves of adjusted N-CADots dialysis solution titrated with KOH

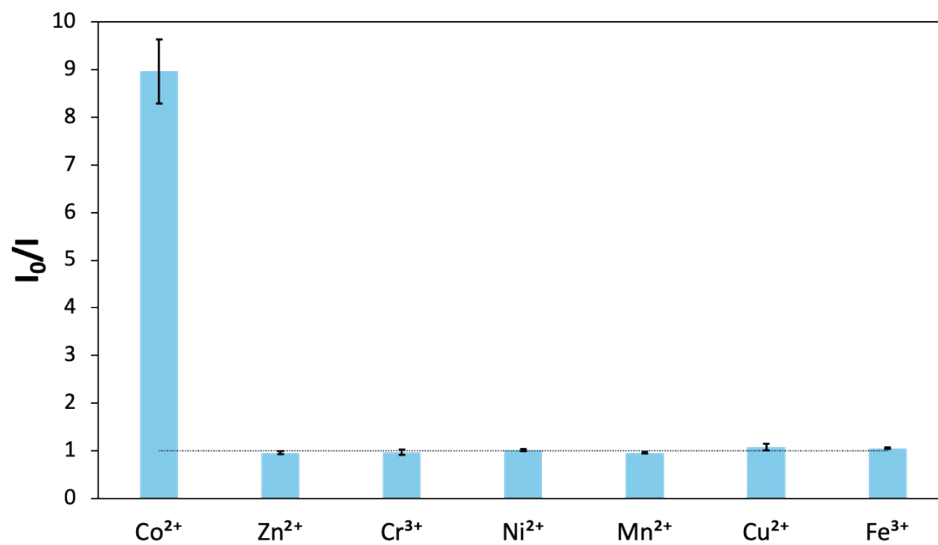

Figure S 4 The effect of TMIs on the ability of catalysed PMC to produce ROS

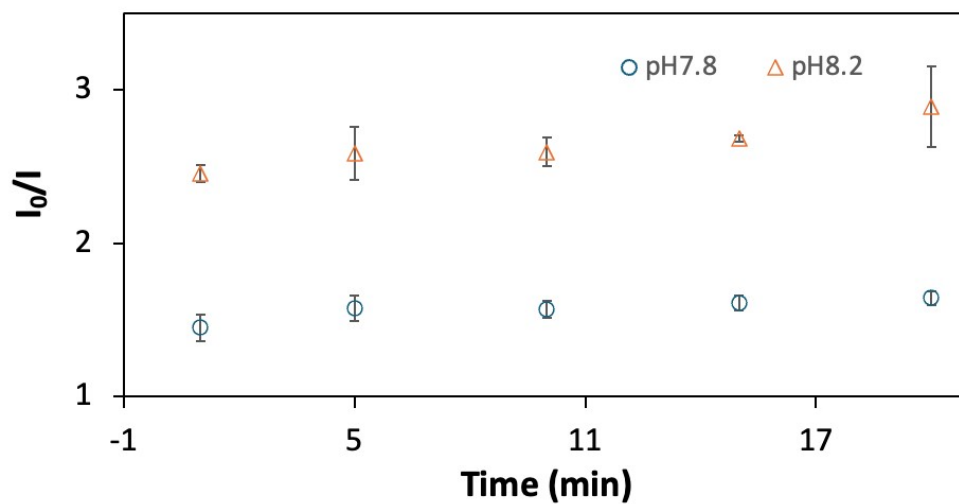

Figure S 5 The effect time on the N-CAdots-AHC- $\text{H}_2\text{O}_2$ - $\text{Co}^{2+}$  reaction at pH 7.8 and pH 8.2

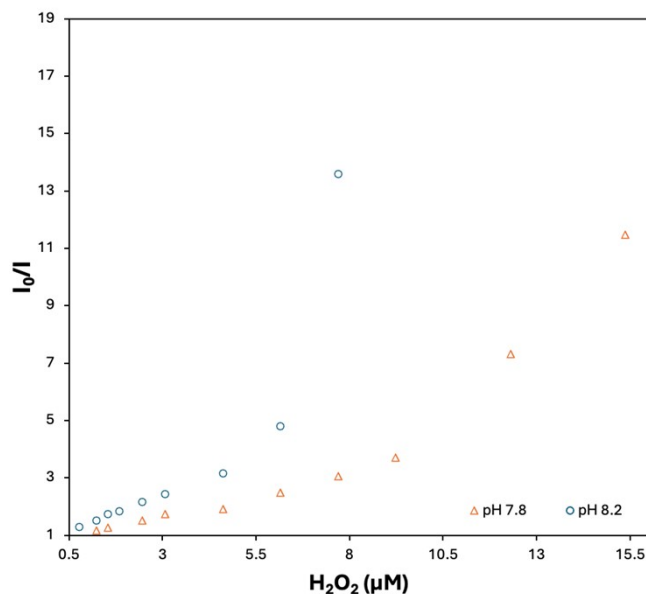

Figure S 6 The nonlinear response of  $I_0/I$  value versus  $H_2O_2$  concentrations at pH 7.8 and pH 8.2

| Concentration(μM) / (ppb) | $I_0/I$ | Calculated | Recovery (%) | RSD (%) | Concentration(μM) / (ppb) | $I_0/I$ | Calculated | Recovery (%) | RSD (%) |
|---------------------------|---------|------------|--------------|---------|---------------------------|---------|------------|--------------|---------|
| 1.23/(39) ~ LOQ           | 1.3063  | 1.33       | 83.4 - 109.3 | 9.0     | 3.07/(105)                | 1.8289  | 2.77       | 85.4 - 109.4 | 7.8     |
|                           | 1.2448  | 1.16       |              |         |                           | 1.7801  | 2.63       |              |         |
|                           | 1.2813  | 1.26       |              |         |                           | 1.9375  | 3.07       |              |         |
|                           | 1.3128  | 1.35       |              |         |                           | 1.8756  | 2.90       |              |         |
|                           | 1.3000  | 1.31       |              |         |                           | 1.8625  | 2.86       |              |         |
|                           | 1.2790  | 1.25       |              |         |                           | 1.8756  | 2.90       |              |         |
|                           | 1.2886  | 1.28       |              |         |                           | 1.7662  | 2.59       |              |         |
|                           | 1.1981  | 1.03       |              |         |                           | 1.9427  | 3.08       |              |         |
|                           | 1.0293  | 1.21       |              |         |                           | 1.9517  | 3.10       |              |         |
| 9.22/(313)                | 3.6784  | 7.86       | 85.1 - 103.3 | 6.6     |                           |         |            |              |         |
|                           | 3.8221  | 8.26       |              |         |                           |         |            |              |         |
|                           | 4.1755  | 9.23       |              |         |                           |         |            |              |         |
|                           | 4.1636  | 9.20       |              |         |                           |         |            |              |         |
|                           | 4.1814  | 9.25       |              |         |                           |         |            |              |         |
|                           | 4.1994  | 9.30       |              |         |                           |         |            |              |         |
|                           | 3.8271  | 8.27       |              |         |                           |         |            |              |         |
|                           | 4.0321  | 8.83       |              |         |                           |         |            |              |         |
|                           | 4.2852  | 9.53       |              |         |                           |         |            |              |         |

Table S 3 The validation of detection  $H_2O_2$  by N-CAdots-AHC-Co<sup>2+</sup> at pH 7.8

| Concentration ( $\mu\text{M}$ )/ (ppb) | $I_0/I$ | Calculated | Recovery (%) | RSD (%) | Concentration ( $\mu\text{M}$ )/ (ppb) | $I_0/I$ | Calculated | Recovery (%) | RSD (%) |
|----------------------------------------|---------|------------|--------------|---------|----------------------------------------|---------|------------|--------------|---------|
| 0.76 / (25)<br>~ LOQ                   | 1.3295  | 0.79       | 85.0 - 114.8 | 9.1     | 4.61/(148)                             | 3.2783  | 3.28       | 85.4 - 109.4 | 7.8     |
|                                        | 1.3113  | 0.75       |              |         |                                        | 3.0477  | 3.05       |              |         |
|                                        | 1.2990  | 0.72       |              |         |                                        | 2.8562  | 2.86       |              |         |
|                                        | 1.3321  | 0.79       |              |         |                                        | 3.1267  | 3.13       |              |         |
|                                        | 1.3340  | 0.80       |              |         |                                        | 3.0611  | 3.06       |              |         |
|                                        | 1.3791  | 0.89       |              |         |                                        | 3.3905  | 3.39       |              |         |
|                                        | 1.2906  | 0.71       |              |         |                                        | 3.2475  | 3.25       |              |         |
|                                        | 1.2652  | 0.65       |              |         |                                        | 3.0113  | 3.01       |              |         |
| 1.84/(59)                              | 1.7835  | 1.73       | 90.1 - 108.5 | 6.8     |                                        |         |            |              |         |
|                                        | 1.9048  | 1.98       |              |         |                                        |         |            |              |         |
|                                        | 1.7531  | 1.66       |              |         |                                        |         |            |              |         |
|                                        | 1.8186  | 1.80       |              |         |                                        |         |            |              |         |
|                                        | 1.8564  | 1.88       |              |         |                                        |         |            |              |         |
|                                        | 1.9180  | 2.00       |              |         |                                        |         |            |              |         |
|                                        | 1.8638  | 1.89       |              |         |                                        |         |            |              |         |

Table S 4 The validation of detection  $\text{H}_2\text{O}_2$  by N-CAdots-AHC- $\text{Co}^{2+}$  at pH 8.2

| Concentration ( $\mu\text{M}$ )/ (ppb) | $I_0/I$ | Calculated | Recovery (%) | RSD (%) | Concentration ( $\mu\text{M}$ )/ (ppb) | $I_0/I$ | Calculated | Recovery (%) | RSD (%) |
|----------------------------------------|---------|------------|--------------|---------|----------------------------------------|---------|------------|--------------|---------|
| 5.1/(0.55) ~ LOQ                       | 1.7254  | 4.82       | 92.6 - 101.8 | 3.2     | 7.67/ (0.825)                          | 3.8884  | 7.84       | 88.8 - 102   | 3.5     |
|                                        | 1.7901  | 4.91       |              |         |                                        | 3.4772  | 7.27       |              |         |
|                                        | 1.8740  | 5.03       |              |         |                                        | 3.5911  | 7.43       |              |         |
|                                        | 1.8076  | 4.94       |              |         |                                        | 3.7315  | 7.62       |              |         |
|                                        | 1.6540  | 4.72       |              |         |                                        | 3.4013  | 7.16       |              |         |
|                                        | 1.9017  | 5.07       |              |         |                                        | 3.4609  | 7.24       |              |         |
|                                        | 1.9913  | 5.19       |              |         |                                        | 3.1513  | 6.81       |              |         |
| 15.34/ (1.65)                          | 8.7547  | 14.64      | 84.8 - 104   | 7.8     |                                        |         |            |              |         |

Table S 5 The validation of new modified GOD method
